# Supplementary material
Source: PubMed Central journal article supplement (PMC5395302)
Supplement: NIHMS848939-supplement-6.pdf [file NIHMS848939-supplement-6.pdf]

# nature research

## Author Policy and Rights Worksheet

**CORRESPONDING AUTHOR:** Prof. Gerald Crabtree

**MS NUMBER:** NSMB-A36834B

**MS TYPE:** Article

### Instructions:

- Review each point
- Initial for completion
- If required, ensure that there is an appropriate statement in the body of your paper
- Upload the completed and signed worksheet along with other required documents as separate files with your final submission. Please note that certain forms may require a physical signature. Submitting a digitally signed form may delay acceptance.

Please note that failure to provide the requested documents and information will delay acceptance and publication of your paper. For additional guidance, please contact our editorial assistant at [nsmb@us.nature.com](mailto:nsmb@us.nature.com)

| PERMISSION TO PUBLISH                                                                                                                                                                                                                                                                                                                                                                                                                                                                                                                                                                                                                                                                                                                                                                                                                                                                                                                                                                                                                                                                                                                | Author Confirmation                                                                                                                                               |
|--------------------------------------------------------------------------------------------------------------------------------------------------------------------------------------------------------------------------------------------------------------------------------------------------------------------------------------------------------------------------------------------------------------------------------------------------------------------------------------------------------------------------------------------------------------------------------------------------------------------------------------------------------------------------------------------------------------------------------------------------------------------------------------------------------------------------------------------------------------------------------------------------------------------------------------------------------------------------------------------------------------------------------------------------------------------------------------------------------------------------------------|-------------------------------------------------------------------------------------------------------------------------------------------------------------------|
| <p><b>Before we can move ahead with acceptance and publication of your paper we must receive formal written permission use, edit, publish and distribute your work.</b></p> <p>Please note that you will retain copyright your paper, but that you are granting Nature Research certain rights and permissions for the full term of copyright and any extension thereto, as outlined in the License to Publish form.</p> <p><b>Please complete, sign, and return the form linked below.</b> Our legal department demands that we no longer accept "e-signatures" on any legal document, so please return the form with a handwritten signature, or an embedded image of a handwritten signature. <b>All legal forms must be signed by the corresponding author.</b></p> <p><b>All contributing authors must be listed on the License to Publish. If you cannot fit the names in the provided field, please instead write "see attached page" and include a second page with the full author list.</b></p> <p><a href="http://www.nature.com/licenceforms/npg/nai-ltp.pdf">http://www.nature.com/licenceforms/npg/nai-ltp.pdf</a></p> | <p style="text-align: center;"></p> <p>Author Initial <u>    GRC    </u></p> |
| COLOR CHARGE AGREEMENT                                                                                                                                                                                                                                                                                                                                                                                                                                                                                                                                                                                                                                                                                                                                                                                                                                                                                                                                                                                                                                                                                                               | Author Confirmation                                                                                                                                               |
| <p>We are committed to providing authors with the highest quality figures. In order to cover part of the additional cost of four-color reproduction, we charge authors a fee of \$620 for the first color figure and \$310 for each additional color figure. There are no additional submission fees or page charges.</p> <p><b>Please complete and sign the form linked here and return the form linked below:</b></p> <p><a href="http://www.nature.com/research/colour-form/rj-colour-figure-forms-2016.pdf">http://www.nature.com/research/colour-form/rj-colour-figure-forms-2016.pdf</a></p>                                                                                                                                                                                                                                                                                                                                                                                                                                                                                                                                   | <p style="text-align: center;"></p> <p>Author Initial <u>    GRC    </u></p> |

|                                                                                                                                                                                                                                                                                                                                                                                                                                                                                                                                                                                                                                                                                                                                                                                                                                                                                                                                                                                                                                                                               |                                                                                                                                                                                                                                                                  |
|-------------------------------------------------------------------------------------------------------------------------------------------------------------------------------------------------------------------------------------------------------------------------------------------------------------------------------------------------------------------------------------------------------------------------------------------------------------------------------------------------------------------------------------------------------------------------------------------------------------------------------------------------------------------------------------------------------------------------------------------------------------------------------------------------------------------------------------------------------------------------------------------------------------------------------------------------------------------------------------------------------------------------------------------------------------------------------|------------------------------------------------------------------------------------------------------------------------------------------------------------------------------------------------------------------------------------------------------------------|
| <p><b>COMPETING FINANCIAL INTEREST STATEMENTS (CFI)</b></p> <p>Nature Research defines <b>Competing Financial Interest (CFI)</b> as being when an author stands to receive financial gain from the publication of their work in a way that could potentially influence that writer's objectivity. This includes funding or current or recent employment by organizations that may gain or lose financially through this publication, including major pharmaceutical companies, or personal interest such as stocks, shares, or patents that could benefit financially by publication of the work.</p> <p><b>Please thoroughly review our policy on competing financial interests and include a detailed statement end of your final manuscript file, and in our manuscript tracking system.</b> Please ensure that both statements are identical in both. Be specific about how each point stated relates to the research, list applicable author initials, and patent numbers if applicable. If there are no competing interests, a negative statement must be included.</p> | <p>Author Confirmation</p> <p style="text-align: right;"></p> <p>Author Initial <u>    GRC    </u></p>                                                                        |
| <p><b>LIFE SCIENCES REPORTING CHECKLIST</b></p> <p>Please ensure that you have completed the <u>Life Sciences Reporting Checklist</u> completely and that all requested information has been provided. <b>Please return an updated version with your final materials.</b></p> <p>For more information on Nature Research's initiative to improve our transparency standards and increase reproducibility of published results, please see the guidelines listed <u>here</u>.</p>                                                                                                                                                                                                                                                                                                                                                                                                                                                                                                                                                                                              | <p>Author Confirmation</p> <p style="text-align: right;"></p> <p>Author Initial <u>    GRC    </u></p>                                                                        |
| <p><b>DATA AVAILABILITY STATEMENT</b></p> <p>All manuscripts reporting original research must include a <b>Data Availability Statement</b> informing readers the where they can find any materials, associated protocols, and other supporting data- such as in public repositories.</p> <p>If supporting datasets deposited in data repositories are assigned Digital Object Identifiers (DOIs), then you are encouraged to include formal citations to these datasets in your manuscript.</p> <p>Please place the Data Availability Statement at the end of the Methods section (titled, 'Data availability'), after the Code availability statement if one is present. For papers that do not have a Methods section, Data availability statements should be provided as a separate section before the References or Acknowledgements, whichever comes first.</p> <p>More information on this policy and our availability mandates can be found <u>here</u>.</p>                                                                                                           | <p>Author Confirmation</p> <p style="text-align: right;"></p> <p>Author Initial <u>    GRC    </u></p>                                                                      |
| <p><b>AUTHOR LIST CONFIRMATION</b></p> <p>Please review your complete author list to verify that it is complete and accurate and initial below. We ask that you consult with your coauthors to ensure that all names, affiliations, and titles are represented correctly. Please note that if any authors are added or removed after this point then all authors will be requested to provide approval documentation that could potentially delay the production of your paper.</p> <p><b>We noted that <u>  1  </u> authors have been added since the original submission. Please collect statements from all authors (old and new) to confirm that the current author list is correct and complete. Forwarded emails would serve this purpose.</b></p> <p>Author list: Erik L. Miller, Diana C. Hargreaves, Cigall Kadoch, Chiung-Ying Chang, Joseph P. Calarco, Courtney Hodges, Jason D. Buenrostro, Kairong Cui, William J. Greenleaf, Keji Zhao, Gerald R. Crabtree</p>                                                                                                 | <p>Author Confirmation</p> <p>I have verified the author listed as presented in this paper.</p> <p style="text-align: right;"></p> <p>Author Initial <u>    GRC    </u></p> |

| FUNDING SUPPORT CONFIRMATION                                                                                                                                                                                                                                                                                                                                                                                                                                                                                                                                                                                                                                                                       | Author Confirmation                                                                                                                                                |
|----------------------------------------------------------------------------------------------------------------------------------------------------------------------------------------------------------------------------------------------------------------------------------------------------------------------------------------------------------------------------------------------------------------------------------------------------------------------------------------------------------------------------------------------------------------------------------------------------------------------------------------------------------------------------------------------------|--------------------------------------------------------------------------------------------------------------------------------------------------------------------|
| <p>Information on the grants funding the project must be provided. Please list each grant number, followed by the initials of the author who received it, in the Acknowledgements section of your paper.</p>                                                                                                                                                                                                                                                                                                                                                                                                                                                                                       | <p>I have listed all applicable funding sources in accordance with NRG's funding mandates.<br/>           Author Initial <u>    </u> GRC <u>  <i>See</i>  </u></p> |
| THIRD-PARTY RIGHTS AND REUSE PERMISSIONS                                                                                                                                                                                                                                                                                                                                                                                                                                                                                                                                                                                                                                                           | Author Confirmation                                                                                                                                                |
| <p>It is your responsibility to obtain the right to use any items (figures, tables, images, videos or text boxes) that are reproduced (or adapted) from material for which you do not hold copyright and to give proper attribution to the creators of that work. This includes work that has previously been published elsewhere.</p> <p>If you do not hold the copyright for any such item (in whole or part) that is included in your paper, you must complete and return a <u>Third Party Rights Table</u>.</p> <p>For more information on what constitutes ownership by a third party, please contact our Editorial Assistant at <a href="mailto:nsm@us.nature.com">nsm@us.nature.com</a></p> | <p>Author Initial <u>    </u> GRC <u>  <i>See</i>  </u></p>                                                                                                        |

| ITEMS TO BE INCLUDED WITH FINAL SUBMISSION                                                                                                                                                                                                                                                                                                                                                                                                                                                                                                                                                                                                                                                                                                                                                                                                               | Author; please initial for confirmation                                                                                                   |
|----------------------------------------------------------------------------------------------------------------------------------------------------------------------------------------------------------------------------------------------------------------------------------------------------------------------------------------------------------------------------------------------------------------------------------------------------------------------------------------------------------------------------------------------------------------------------------------------------------------------------------------------------------------------------------------------------------------------------------------------------------------------------------------------------------------------------------------------------------|-------------------------------------------------------------------------------------------------------------------------------------------|
| A point-by-point response to the remaining editorial and reviewer points                                                                                                                                                                                                                                                                                                                                                                                                                                                                                                                                                                                                                                                                                                                                                                                 | AU initial: <u>    </u> GRC <u>  <i>See</i>  </u>                                                                                         |
| License to Publish, <b>hand-signed</b> by the corresponding author                                                                                                                                                                                                                                                                                                                                                                                                                                                                                                                                                                                                                                                                                                                                                                                       | AU initial: <u>    </u> GRC <u>  <i>See</i>  </u>                                                                                         |
| Color Charge Form                                                                                                                                                                                                                                                                                                                                                                                                                                                                                                                                                                                                                                                                                                                                                                                                                                        | AU initial: <u>    </u> GRC <u>  <i>See</i>  </u>                                                                                         |
| Identical CFI statement in both manuscript and Manuscript Tracking System                                                                                                                                                                                                                                                                                                                                                                                                                                                                                                                                                                                                                                                                                                                                                                                | AU initial: <u>    </u> GRC <u>  <i>See</i>  </u>                                                                                         |
| Final version of the Life Sciences Reporting Checklist                                                                                                                                                                                                                                                                                                                                                                                                                                                                                                                                                                                                                                                                                                                                                                                                   | AU initial: <u>    </u> GRC <u>  <i>See</i>  </u>                                                                                         |
| Approval documentation for Author List changes                                                                                                                                                                                                                                                                                                                                                                                                                                                                                                                                                                                                                                                                                                                                                                                                           | AU initial: <u>    </u> GRC <u>  <i>See</i>  </u>                                                                                         |
| Funding Confirmation                                                                                                                                                                                                                                                                                                                                                                                                                                                                                                                                                                                                                                                                                                                                                                                                                                     | AU initial: <u>    </u> GRC <u>  <i>See</i>  </u>                                                                                         |
| Third-Party Rights table                                                                                                                                                                                                                                                                                                                                                                                                                                                                                                                                                                                                                                                                                                                                                                                                                                 | AU initial: <u>    </u> GRC <u>  <i>See</i>  </u>                                                                                         |
| FORMATTING REQUIREMENTS FOR FINAL SUBMISSION                                                                                                                                                                                                                                                                                                                                                                                                                                                                                                                                                                                                                                                                                                                                                                                                             | Author Confirmation                                                                                                                       |
| <p>Please use the supplied <b>Nature Research Formatting Guide</b> when preparing your final submission. Note that if files are not prepared in accordance with these guidelines, or in incorrect formats, this will cause delays in acceptance and publication.</p> <p>Please verify that you have provided the files in the formats listed here:</p> <ul style="list-style-type: none"> <li>• Main text and associated tables in <b>Microsoft Word</b></li> <li>• Figures must be submitted in a <b>layered format</b> with labels, text, lines/shapes and images individually selectable and on separate layers with all file-editing capabilities intact. Preferred formats include <b>AI, EPS, PS, PSD, TIFF</b>.</li> <li>• <b>Supplementary Information</b> prepared in strict accordance with the template and instructions provided.</li> </ul> | <p>I have formatted my paper in accordance with the NRG Formatting Guide.</p> <p>Author Initial <u>    </u> GRC <u>  <i>See</i>  </u></p> |

I have reviewed and verified all points requested to the best of my ability and have included all required documentation with my final submission. SIGNED: David R. Coulter

# LICENSE TO PUBLISH

Manuscript Number:

NSMB-A36834B

Journal Name:

Nature Structural & Molecular Biology

(the "Journal")

Proposed Title of the Contribution:

TOP2 synergizes with BAF chromatin remodeling for both resolution and

(the "Contribution")

Author(s) [Please list all authors, continuing on a separate sheet if necessary]:

Erik L. Miller, Diana C. Hargreaves, Cigall Kadoch, Chiung-Ying Chang,

(the "Author(s)")

Joseph P. Calarco, Courtney Hodges, Jason D. Buenrostro, Kairong Cui, William J. Greenleaf, Keji Zhao, Gerald R. Crabtree  
© Nature America, Inc. trading as Nature Publishing Group ("NPG")

- In consideration of NPG evaluating the Contribution for publication (and publishing the Contribution if NPG so decides) the Author(s) grant to NPG for the full term of copyright and any extensions thereto, subject to clause 2 below, the exclusive right and irrevocable license:
  - to edit, adapt, publish, reproduce, distribute, display and store the Contribution in all forms, formats and media whether now known or hereafter developed (including without limitation in print, digital and electronic form) throughout the world;
  - to translate the Contribution into other languages, create adaptations, summaries or extracts of the Contribution or other derivative works based on the Contribution and exercise all of the rights set forth in (a) above in such translations, adaptations, summaries, extracts and derivative works;
  - to license others to do any or all of the above; and
  - to re-license article metadata without restriction (including but not limited to author name, title, abstract, citation, references, keywords and any additional information, as determined by NPG).
- Ownership of copyright remains with the Author(s), and provided that, when reproducing the Contribution or extracts from it or the Supplementary Information (defined below), the Author(s) acknowledge first and reference publication in the Journal, the Author(s) retain only the following non-exclusive rights:
  - to reproduce the Contribution in whole or in part in any printed volume (book or thesis) of which they are the Author(s);
  - they and any academic institution where they work may reproduce the Contribution for the purpose of course teaching;
  - to post a copy of the Contribution as accepted for publication after peer review (in a locked word processing file, or a PDF version thereof) on the Author(s)' own web sites, or institutional repositories, or the Author(s)' funding body(s)' archive, six months after publication of the printed or online edition of the Journal, provided that they also link to the Contribution on NPG's web site; and
  - to reuse figures or tables created by the Author(s) and contained in the Contribution in oral presentations and other works created by them.
- The Author(s) grant to NPG for the full term of copyright and any extensions thereto the same rights that have been granted in respect of the Contribution as set out in clause 1 above, in and to all supplementary material in any form (including without limitation images, videos, tables and/or graphs) submitted by the Author(s) to NPG with or in connection with the Contribution ("Supplementary Information") but on a non-exclusive basis.
- NPG acknowledges that an earlier version of the Contribution and/or Supplementary Information may have been submitted to a pre-print service (in accordance with that service's standard license terms).
- The Author(s) warrant and represent that:
  - the Author(s) are the sole Author(s) of and sole owners of the copyright in the Contribution and the Supplementary Information and the Contribution and the Supplementary Information is the original work of the Author(s) and not copied (in whole or part) from another work. If however the Contribution or the Supplementary Information includes materials from other sources, the Author(s) warrant they have obtained the necessary rights from the owners of the copyright in all such materials and hereby license to NPG the rights to use such materials in accordance with the grant of rights in clause 1. Copies of all such grant of rights from third parties are attached to this license;
  - all of the facts contained in the Contribution and the Supplementary Information are true and accurate;
  - the signatory (the Author or the employer) who has signed this Agreement below has full right, power and authority to enter into this Agreement and grant the rights herein on behalf of all of the Authors;
  - nothing in the Contribution or the Supplementary Information is obscene, defamatory, libelous, violates any right of privacy or publicity, infringes any intellectual property rights (including without limitation copyright, patent, database or trademark rights) or any other human, personal or other rights of any person or entity or is otherwise unlawful; and
  - nothing in the Contribution or the Supplementary Information infringes any duty of confidentiality which any of the Author(s) may owe to anyone else or violates any contract, express or implied, of any of the Author(s), and all of the institutions in which work recorded in the Contribution or the Supplementary Information was created or carried out, have authorized such publication.
- The Author(s) authorize NPG to take such steps as it considers necessary at its own expense in the Author(s) name and on their behalf if NPG believes that a third party is infringing or is likely to infringe copyright in the Contribution and/or Supplementary Information including but not limited to initiating legal proceedings.
- The Author(s) grant NPG the perpetual right to edit, correct, or retract the Contribution and Supplementary Information if NPG considers (in its reasonable opinion) that such actions are required. The Author(s) hereby agree that they shall not object to NPG carrying out any such actions.
- The Author(s) shall cooperate fully with NPG in relation to any legal action that might arise from the publication of the Contribution and/or Supplementary Information and the Author(s) shall give NPG access at reasonable times to any relevant accounts, documents and records within the power or control of the Author(s).
- If the Contribution is rejected by NPG and not published, all rights under this license shall revert to the Author(s).
- This Agreement shall be governed by the laws of the State of New York, without regards to any conflict of law provisions. The parties submit to the exclusive jurisdiction of the courts located in New York, New York.

Signed for and on behalf of the Author(s):



(PLEASE NOTE, ONLY HAND WRITTEN SIGNATURES ARE ACCEPTED)

Print name:

Gerald R. Crabtree

Date:

1/23/17

Address:

Howard Hughes Medical Institute  
Beckman Center B211, 279 Campus Drive, Mailcode 5323  
Stanford University School of Medicine  
Stanford, CA 94305-5323

Does the Contribution and/or the Supplementary Information contain material from third parties (including previously published images/figures)?

Yes  No  (if yes, please ensure copies of the grant of rights are submitted with this form as indicated in clause 5(a))

**Colour Charges Form – Nature Research Journals****COLOUR FIGURES**

Nature Research Journals are committed to providing authors with the highest quality figures, and we use the latest techniques to achieve this reproduction. We recognise, however, that excessive colour figure and page charges can sometimes place an enormous burden on authors. We therefore charge authors a fee of \$620/£410/€550 for the first colour figure and \$310/£205/€275 per figure for additional colour figures; this covers part, but not all, of our additional costs for four-colour reproduction. Authors will be charged in the currency that is most applicable to the corresponding author's address. (Please note that in EU countries VAT will be added if you are unable to provide us with your VAT details below.)

No author will be denied publication based on his/her inability to meet these charges. If we agree that colour is essential but you are unable to meet the costs, they will be waived if you explain the circumstances before your paper is published. Otherwise you will be billed after publication.

**PLEASE COMPLETE AND SIGN THE SECTION BELOW AND RETURN A COPY OF THIS SHEET TO THE EDITORIAL ASSISTANT BY REPLYING TO THE EMAIL, WHERE THE LINK TO THIS FORM CAN BE FOUND. PLEASE NOTE: THERE ARE 2 PAGES TO THE FORM.**

**Corresponding Author Name**

Gerald R. Crabtree

**Journal**

Nature Structural &amp; Molecular Biology

**Manuscript Reference Number:**

NSMB-A36834B

**Contact Name** (please note: this will be the person that will process the invoice)

Penny Brueggemann

**Contact email address** (please note: this is where the invoice will be sent)

pbruegge@stanford.edu

**Contact Address:**Department: Howard Hughes Medical Institute Institution/Organisation Stanford UniversityFirst line of your address: Beckman Center B211, 279 Campus Drive, Mailcode 5323

Second line of your address: \_\_\_\_\_

City: Stanford, CA Postal Code: 94305-5323 Country: USA

Please tick the options that do apply.

I agree to pay the sum requested in the event that colour is considered essential.

I am unable to meet the costs of colour for the following reason:

I am a VAT registered paying member of the EU

If you ticked the VAT box above, you must provide your VAT number below

VAT NUMBER

|  |  |  |  |  |  |  |  |  |  |  |  |  |  |  |  |  |  |  |  |  |  |  |
|--|--|--|--|--|--|--|--|--|--|--|--|--|--|--|--|--|--|--|--|--|--|--|
|  |  |  |  |  |  |  |  |  |  |  |  |  |  |  |  |  |  |  |  |  |  |  |
|--|--|--|--|--|--|--|--|--|--|--|--|--|--|--|--|--|--|--|--|--|--|--|

SIGNED: 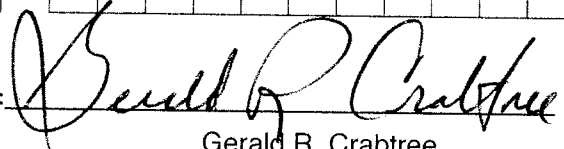

NAME IN BLOCK LETTERS: Gerald R. Crabtree
